# Supplementary material for: Combining magnetoencephalography with magnetic resonance imaging enhances learning of surrogate-biomarkers
Source: eLife journal article supplement (doi:10.7554/elife.54055), 2020-05-18

**A**

 Full
  Source Activity
  Sensor Mixed

 Combined Source
  Source Connectivity
  Chance

Stacking Models

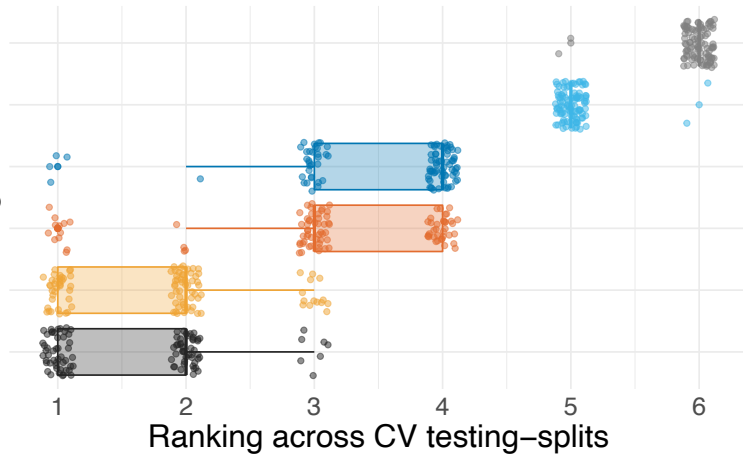**B**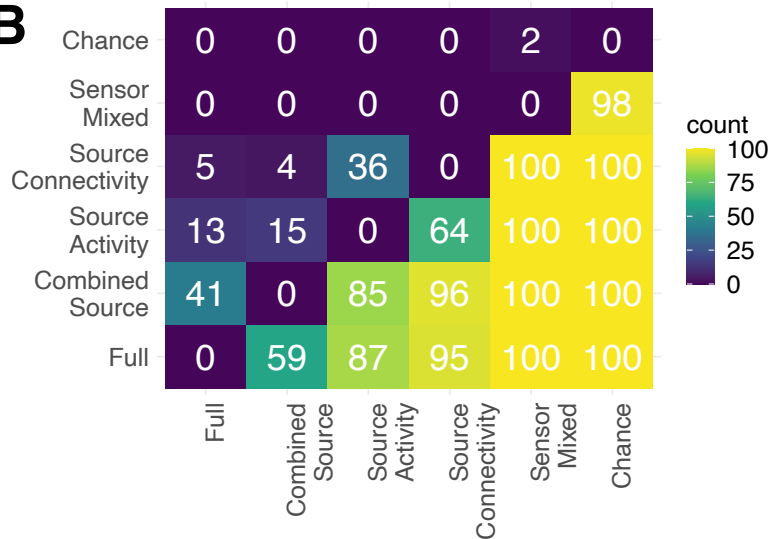

Supplement: supp [file elife_poa_e54055_Figure_4_figure_supplement_1.pdf › elife_poa_e54055_Figure_4_figure_supplement_1.pdf]
