# Supplementary figures and images for: Combining magnetoencephalography with magnetic resonance imaging enhances learning of surrogate-biomarkers
Source: eLife journal article supplement (doi:10.7554/elife.54055), 2020-05-18

**A**

Stacking Models

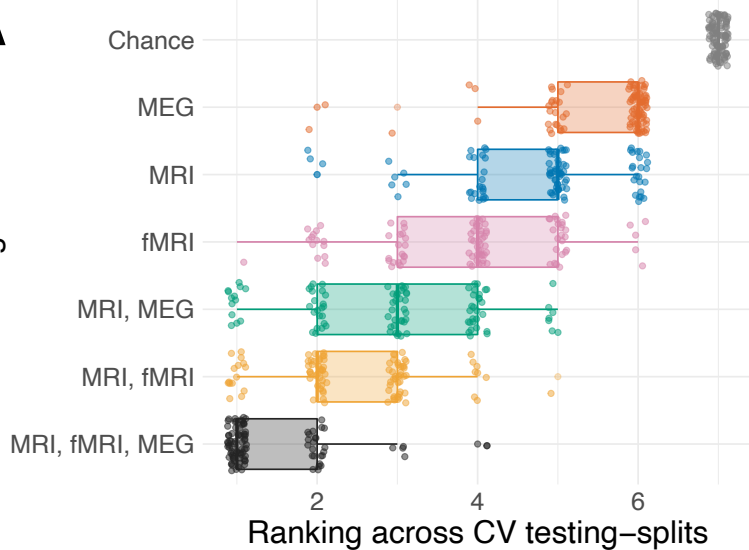**B**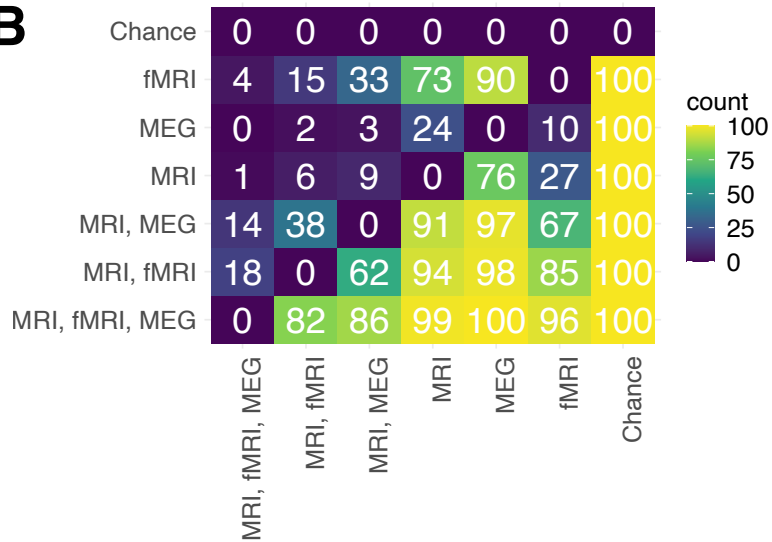

Supplement: supp [file elife_poa_e54055_Figure_2_figure_supplement_1.pdf › elife_poa_e54055_Figure_2_figure_supplement_1.pdf]

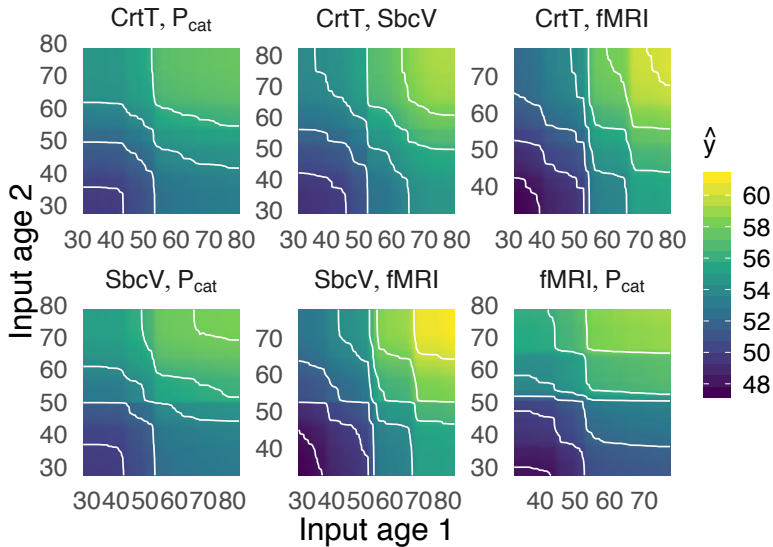

Supplement: supp [file elife_poa_e54055_Figure_2_figure_supplement_2.pdf › elife_poa_e54055_Figure_2_figure_supplement_2.pdf]

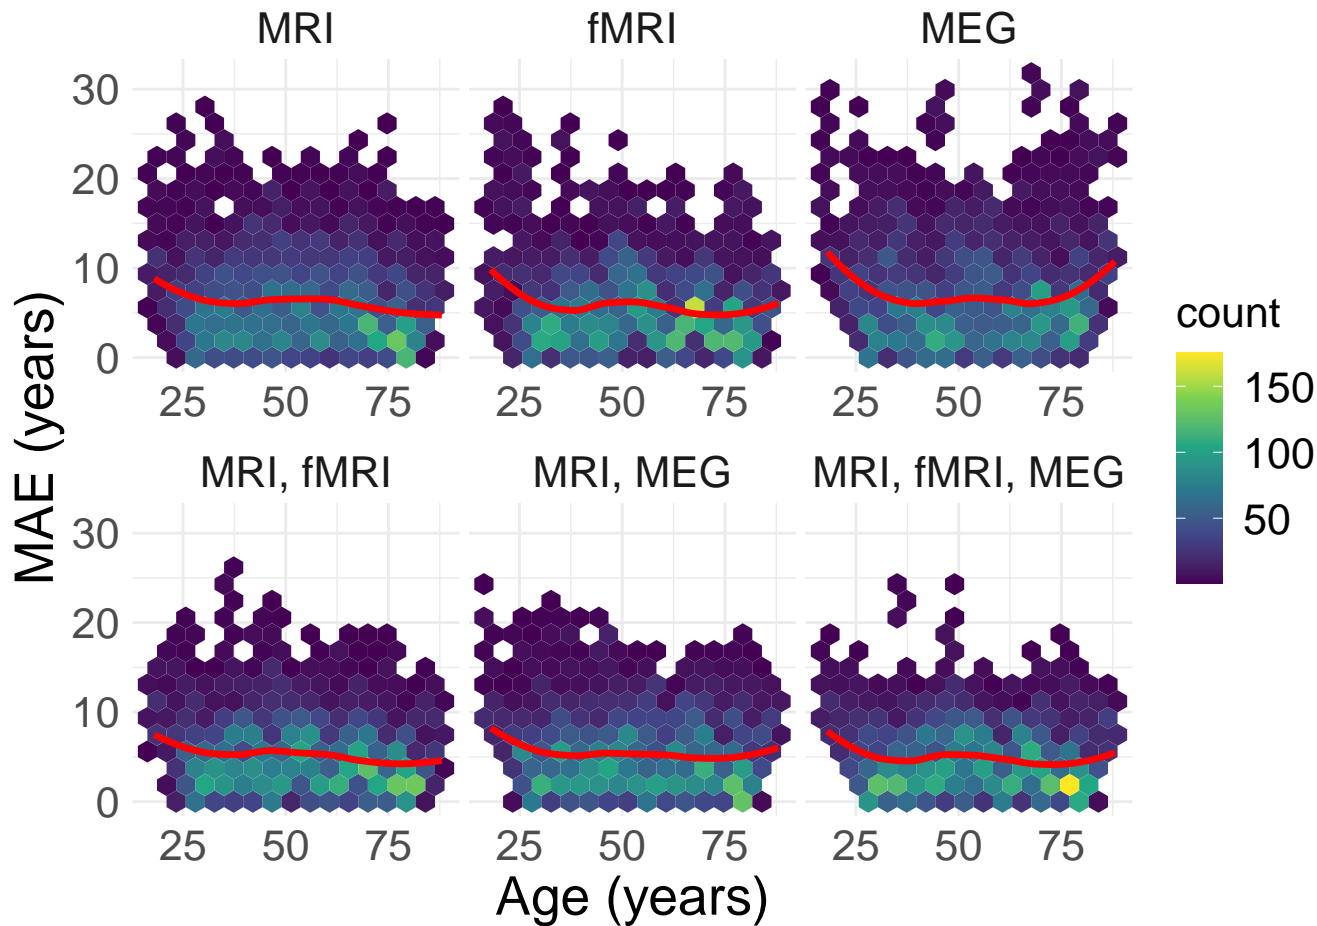

Supplement: supp [file elife_poa_e54055_Figure_2_figure_supplement_3.pdf › elife_poa_e54055_Figure_2_figure_supplement_3.pdf]

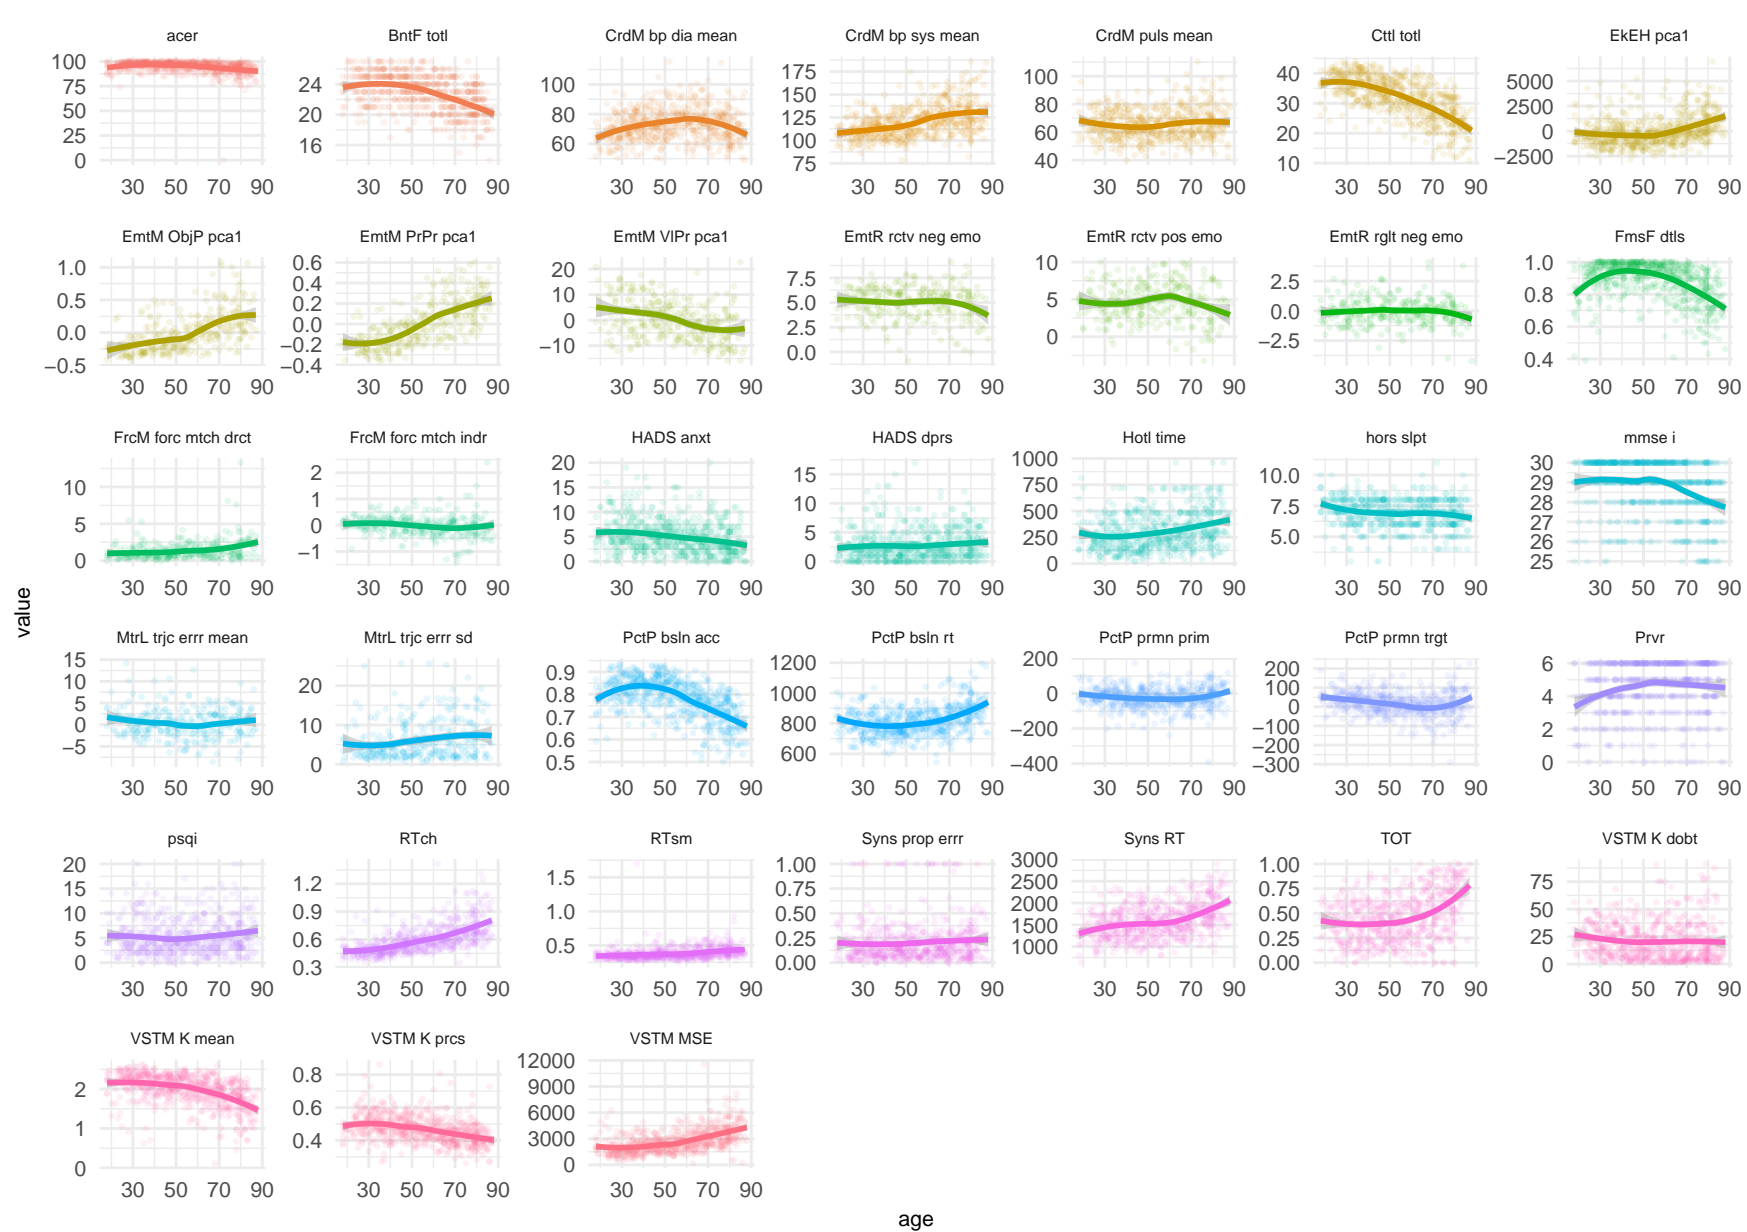

Supplement: supp [file elife_poa_e54055_Figure_3_figure_supplement_1.pdf › elife_poa_e54055_Figure_3_figure_supplement_1.pdf]

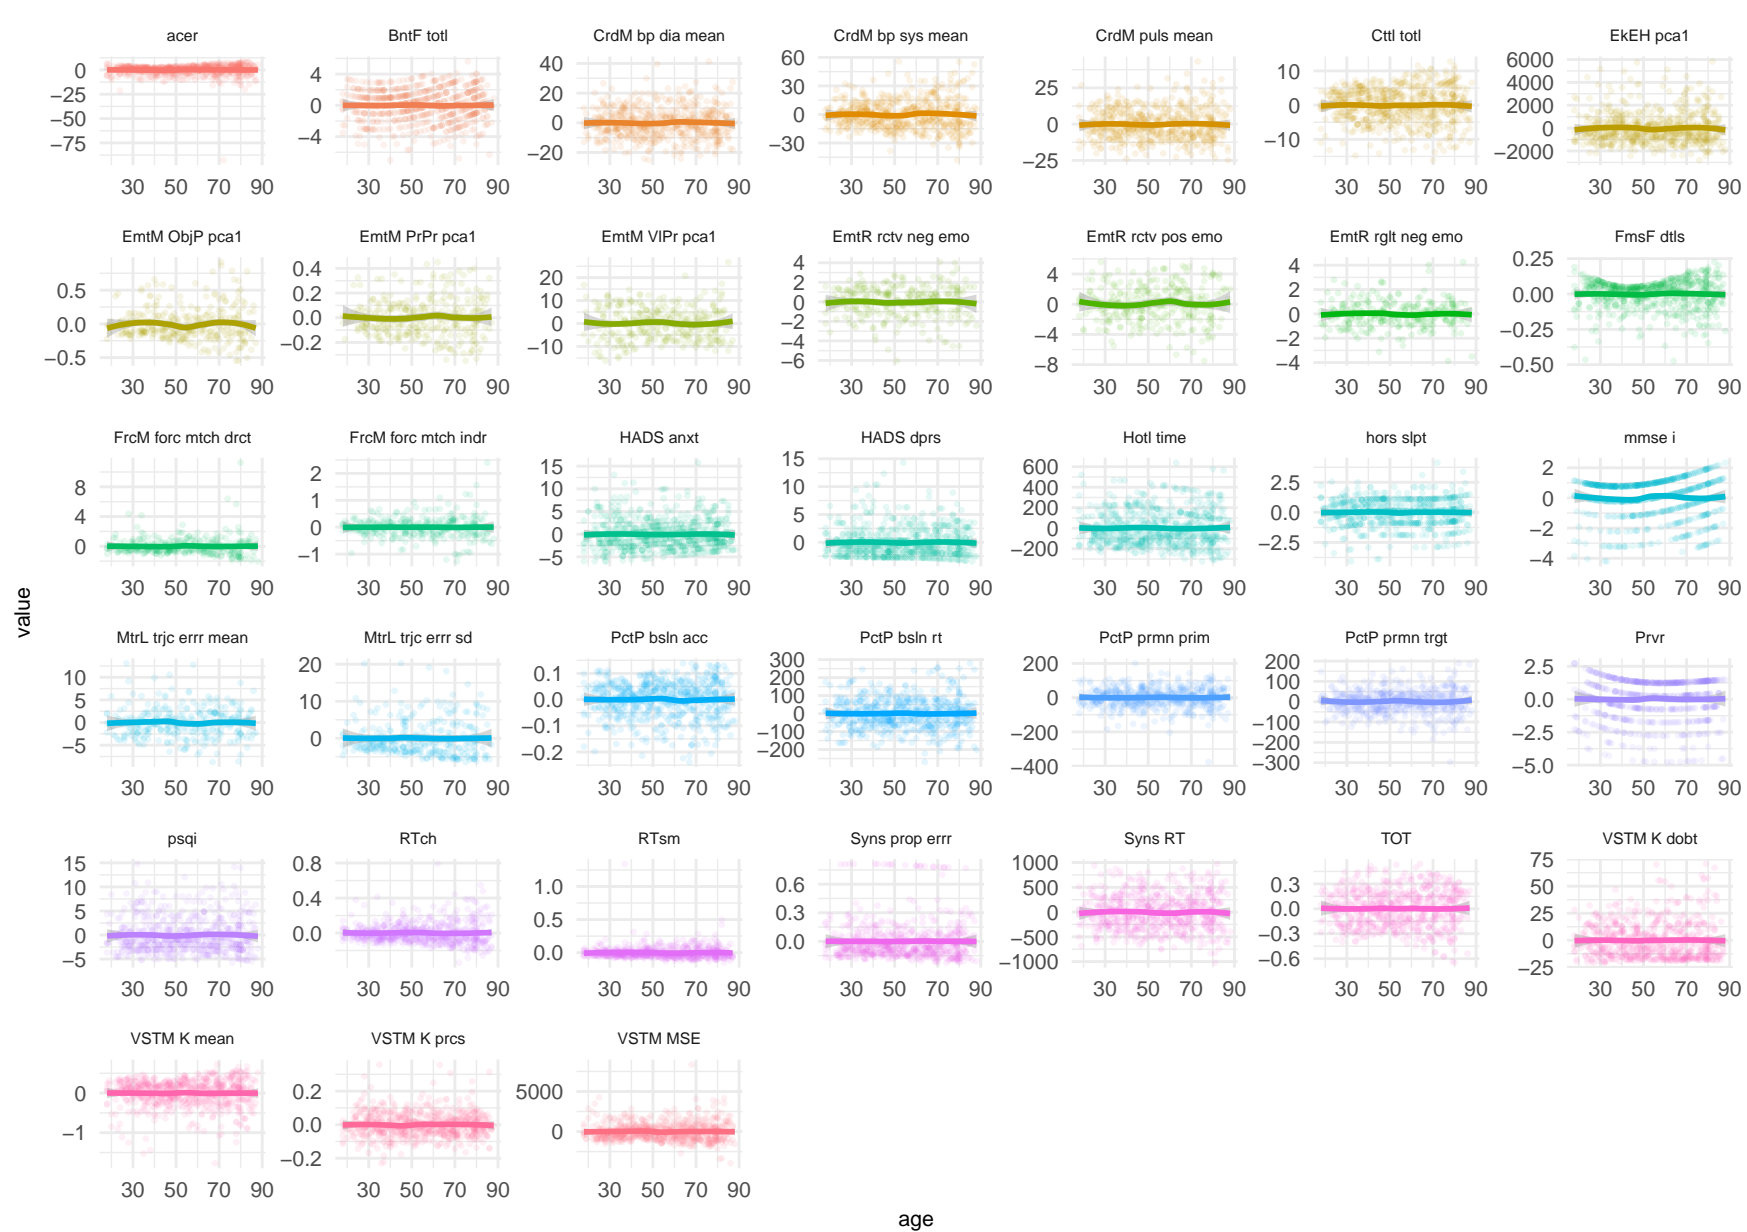

Supplement: supp [file elife_poa_e54055_Figure_3_figure_supplement_2.pdf › elife_poa_e54055_Figure_3_figure_supplement_2.pdf]

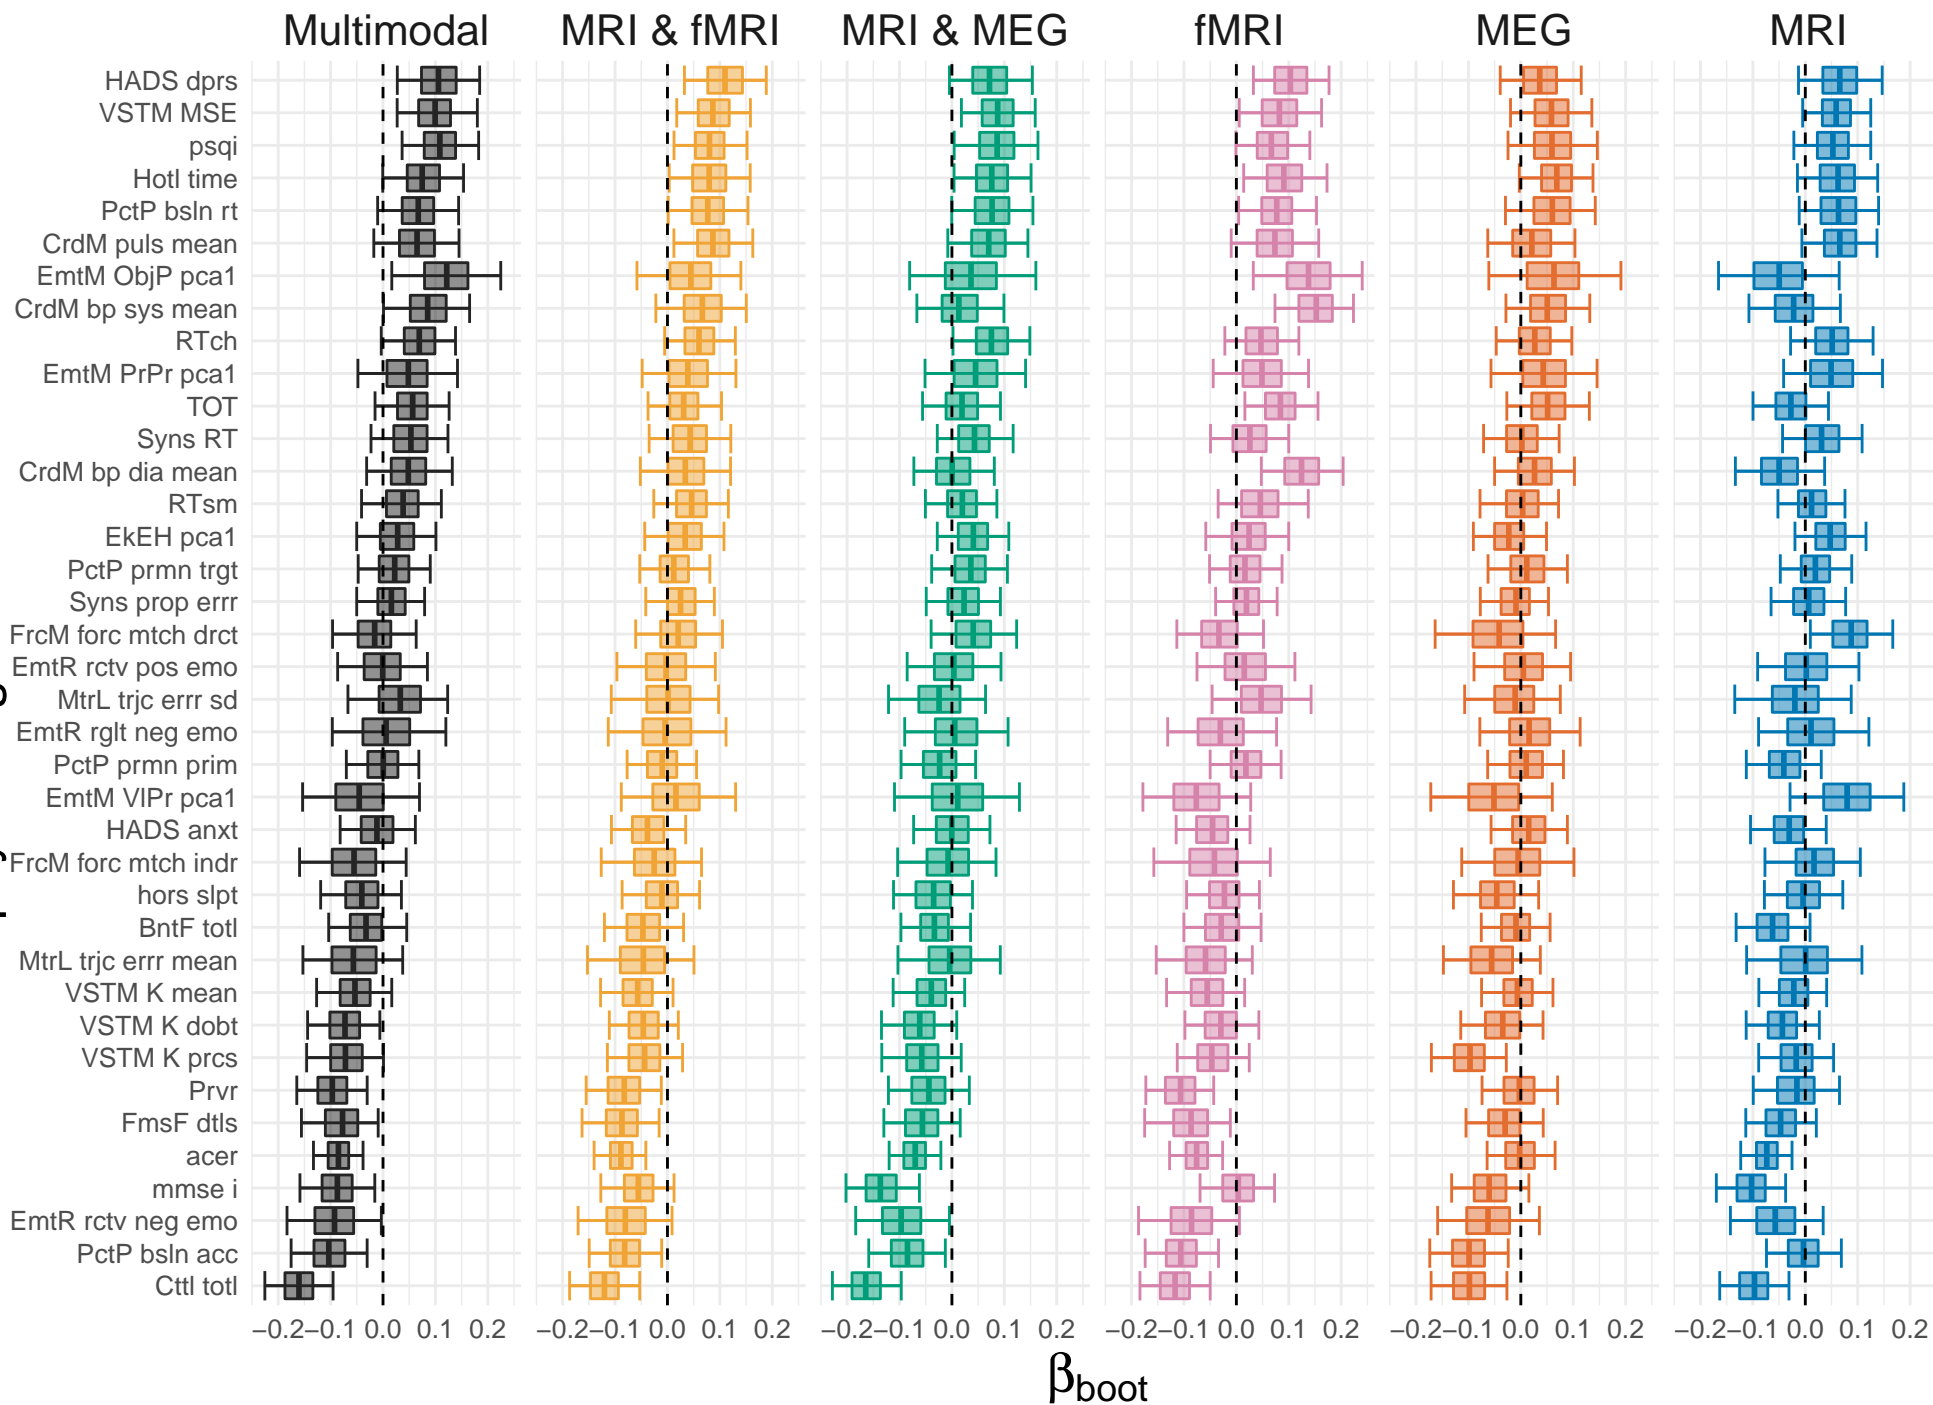

Supplement: supp [file elife_poa_e54055_Figure_3_figure_supplement_3.pdf › elife_poa_e54055_Figure_3_figure_supplement_3.pdf]

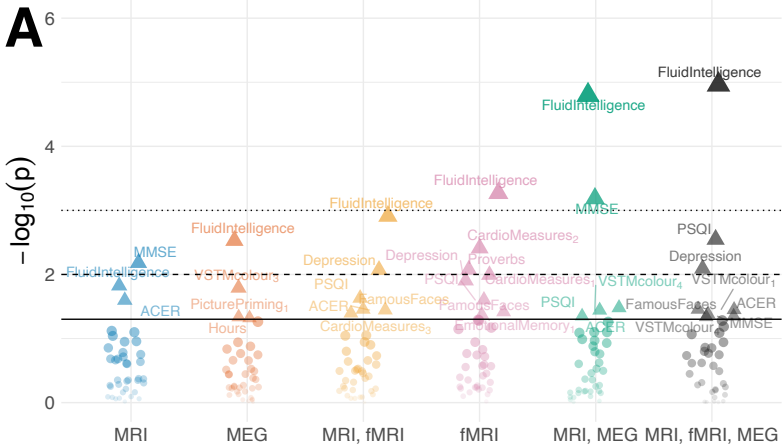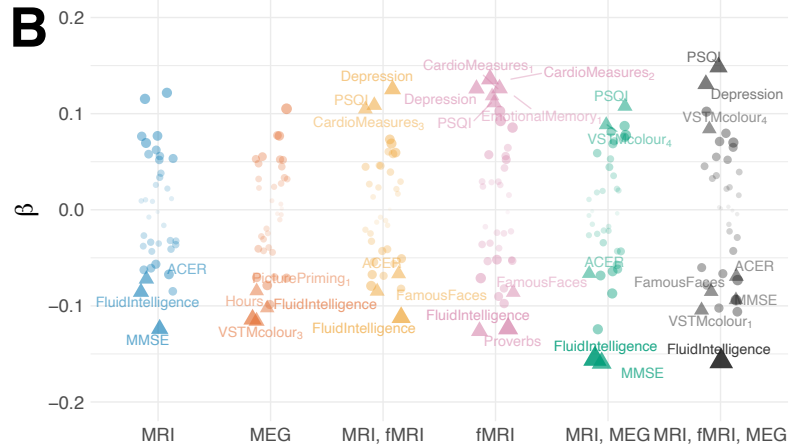

Supplement: supp [file elife_poa_e54055_Figure_3_figure_supplement_5.pdf › elife_poa_e54055_Figure_3_figure_supplement_5.pdf]

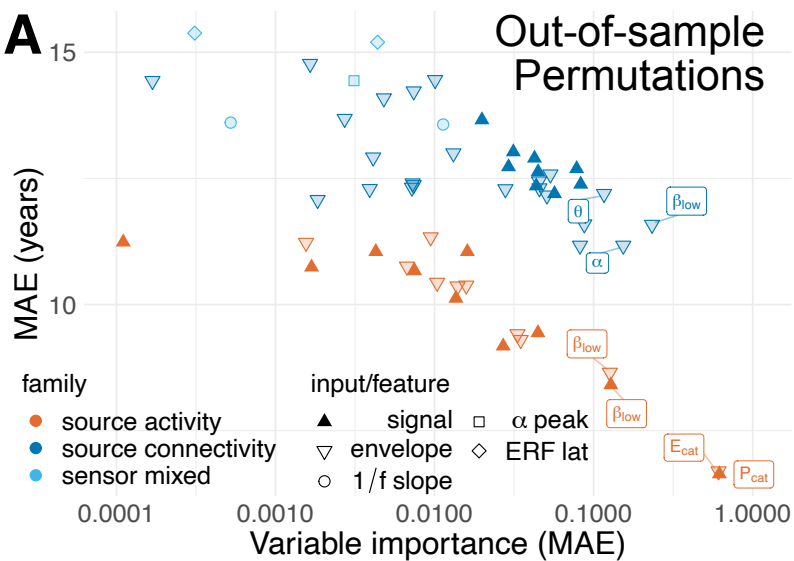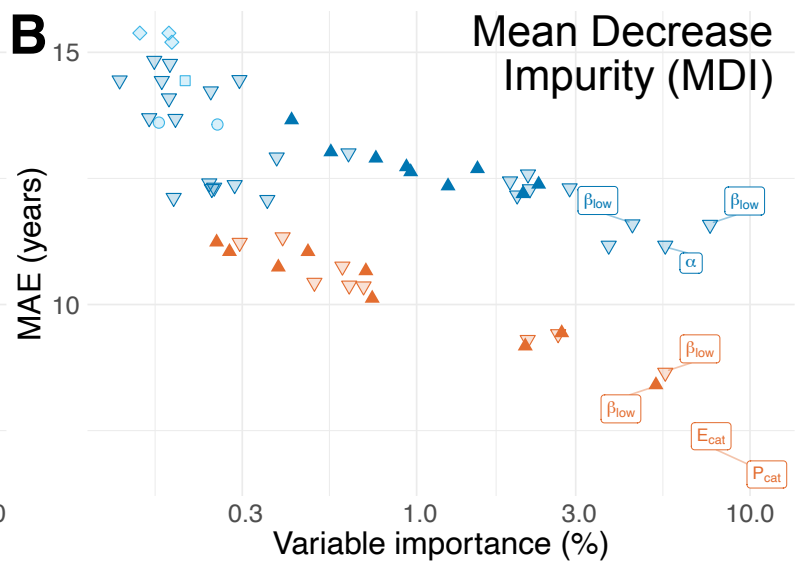

Supplement: supp [file elife_poa_e54055_Figure_4_figure_supplement_2.pdf › elife_poa_e54055_Figure_4_figure_supplement_2.pdf]

Age predictor (years)

family

— source activity  
— source connectivity

input

— envelope  
-- signal

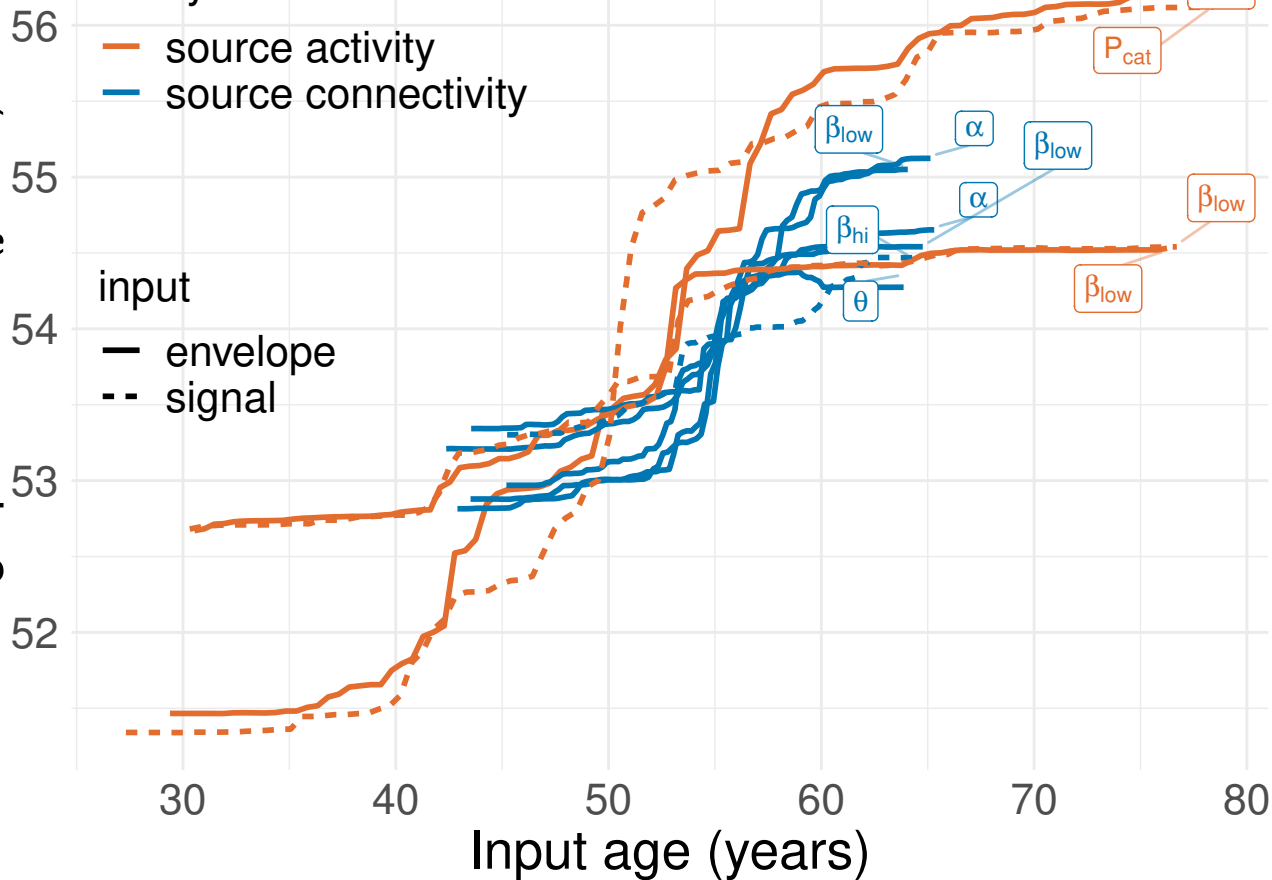

Supplement: supp [file elife_poa_e54055_Figure_4_figure_supplement_3.pdf › elife_poa_e54055_Figure_4_figure_supplement_3.pdf]

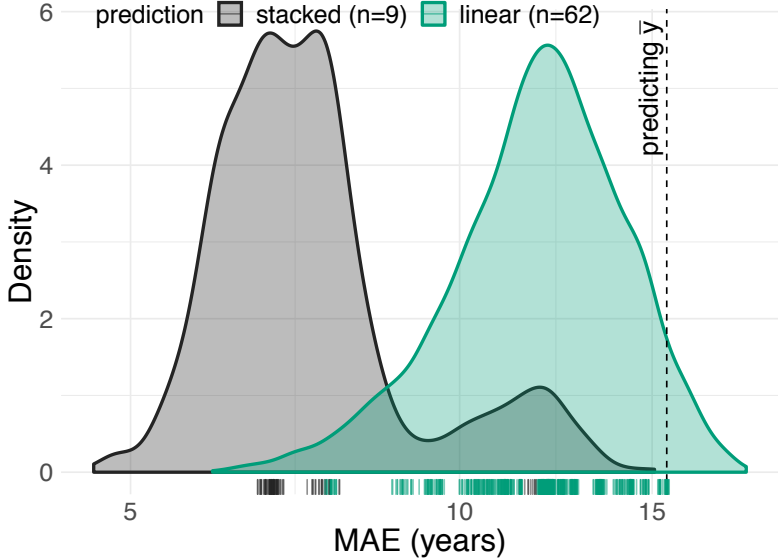

Supplement: supp [file elife_poa_e54055_Figure_4_figure_supplement_4.pdf › elife_poa_e54055_Figure_4_figure_supplement_4.pdf]
